# Supplementary material for: Out-of-Pocket Costs of Diagnostic Breast Imaging Services After Screening Mammography Among Commercially Insured Women From 2010 to 2017
Source: PubMed Central journal article supplement (PMC8371567; doi:10.1001/jamanetworkopen.2021.21347), 2021-08-17
Supplement: jamanetwopen-e2121347-s001.pdf [file jamanetwopen-e2121347-s001.pdf]

## Supplementary Online Content

Lowry KP, Bell S, Fendrick AM, Carlos RC. Out-of-pocket costs of diagnostic breast imaging services after screening mammography among commercially insured women from 2010 to 2017. *JAMA Netw Open*. 2021;4(8):e2121347.  
doi:10.1001/jamanetworkopen.2021.21347

**eFigure.** Flow Diagram of Screening Episode Selection With Exclusions

**eTable.** Diagnosis and Procedural Codes Used to Identify Claims for Breast Imaging Examinations and Procedures

This supplementary material has been provided by the authors to give readers additional information about their work.

**eFigure. Flow Diagram of Screening Episode Selection With Exclusions**

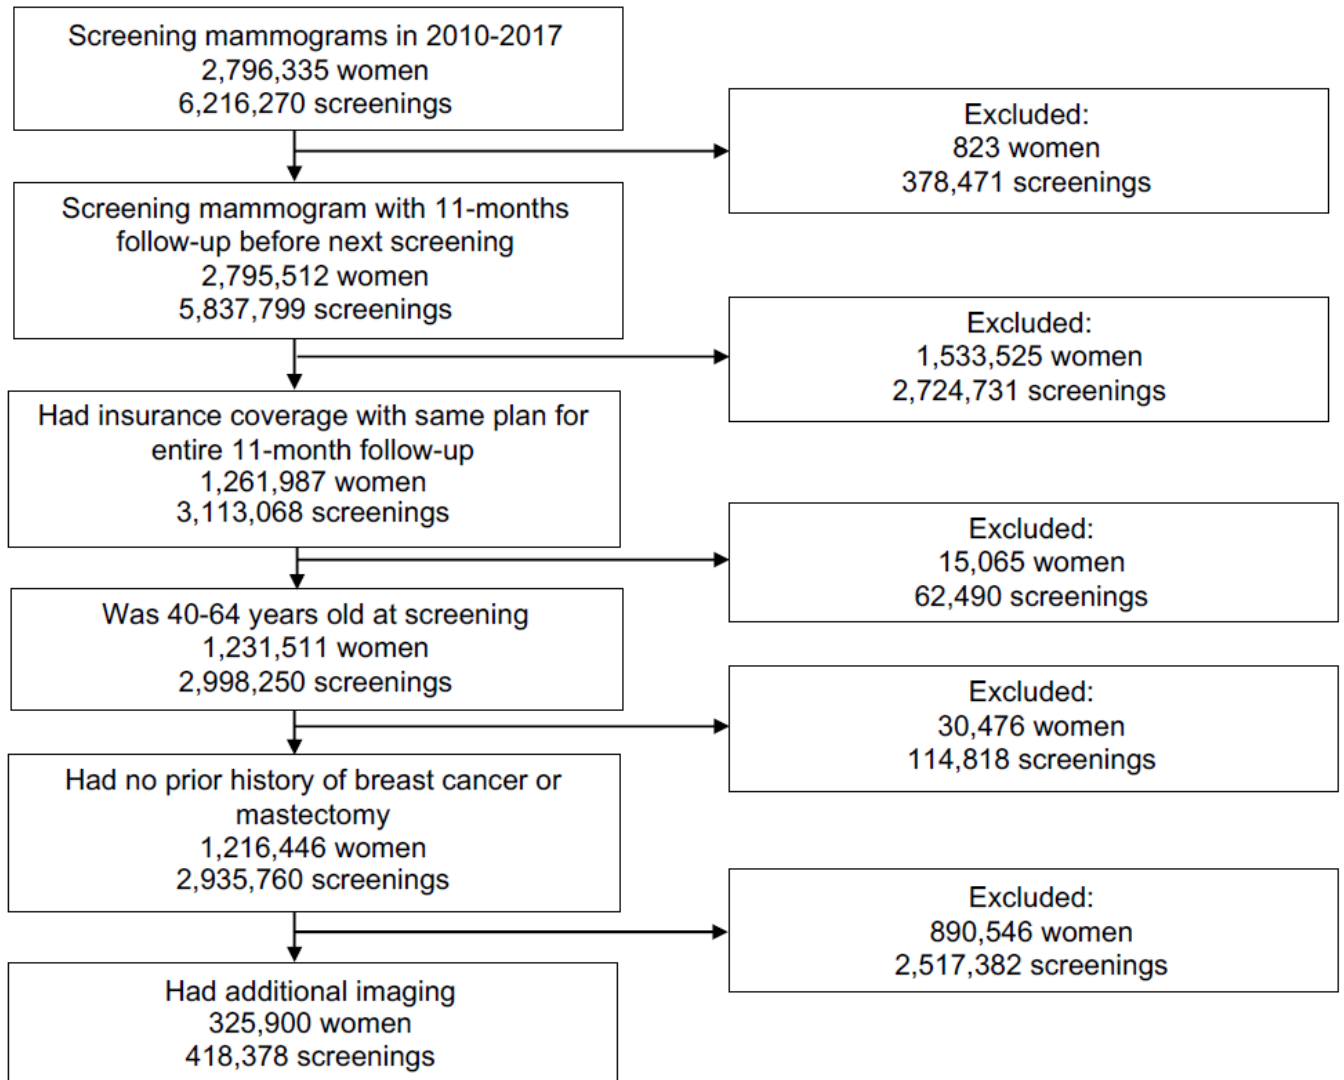

**eTable. Diagnosis and Procedural Codes Used to Identify Claims for Breast Imaging Examinations and Procedures**

| <b>Diagnosis/Procedure</b> | <b>ICD-9 and ICD-10 Codes</b>                                                                                                                                                                                                                                                                                                                | <b>CPT/HCPCS Codes</b>                                                                                                                            |
|----------------------------|----------------------------------------------------------------------------------------------------------------------------------------------------------------------------------------------------------------------------------------------------------------------------------------------------------------------------------------------|---------------------------------------------------------------------------------------------------------------------------------------------------|
| Mastectomy                 | 8541, 8542, 8543, 8544, 8545, 8546, 8547, 8548, 0HTT0ZZ, 0HTU0ZZ, 0HTV0ZZ, 07T50ZZ, 07T60ZZ, 07T70ZZ, 07T80ZZ, 07T90ZZ, 0H0T0JZ, 0H0T3JZ, 0H0U0JZ, 0H0U3JZ, 0H0V0JZ, 0H0V3JZ, 0HBT0ZZ, 0HBT3ZZ, 0HBU0ZZ, 0HBU3ZZ, 0HBV0ZZ, 0HBV3ZZ, 0HRT0JZ, 0HRT3JZ, 0HRU0JZ, 0HRU3JZ, 0HRV0JZ, 0HRV3JZ, 0KTH0ZZ, 0KTJ0ZZ, Z901, Z9010, Z9011, Z9012, Z9013 | 19160, 19162, 19180, 19182, 19200, 19220, 19240, 19301, 19302, 19303, 19304, 19305, 19306, 19307                                                  |
| Screening mammogram        |                                                                                                                                                                                                                                                                                                                                              | G0202, 77057, 76092, 76083, 77067                                                                                                                 |
| Diagnostic mammogram       |                                                                                                                                                                                                                                                                                                                                              | 76082, 76090, 76091, 77055, 77056, G0204, G0206, 77065, 77066                                                                                     |
| Magnetic resonance imaging |                                                                                                                                                                                                                                                                                                                                              | 0159T, 77058, 77059, 77046, 77047, 77048, 77049                                                                                                   |
| Biopsy                     |                                                                                                                                                                                                                                                                                                                                              | 10021, 19100, 19102, 19103, 19290, 19291, 19295, 76095, 76096, 76098, 76942, 77031, 77032, 19081, 19082, 19083, 19084, 19085, 19086, 10005, 10006 |
| Ultrasound                 |                                                                                                                                                                                                                                                                                                                                              | 76645, 76641, 76642                                                                                                                               |
| History of breast cancer   | 1740, 1741, 1742, 1743, 1744, 1745, 1746, 1748, 1749, V103, 2330, Z853, D0590, D0591, D0592                                                                                                                                                                                                                                                  |                                                                                                                                                   |

Abbreviations: CPT, Current Procedural Terminology; HCPC, Healthcare Common Procedural Coding; ICD, International Classification of Diseases.
